# Supplementary material for: Mesothelioma Mouse Models with Mixed Genomic States of Chromosome and Microsatellite Instability
Source: MDPI journal article supplement (doi:10.3390/cancers14133108), 2022-06-24
Supplement: s1 [file s1]

Supplementary Material

# Mesothelioma mouse models with mixed genomic states of chromosome and microsatellite instability

Yurong Song <sup>1\*</sup>, Shaneen S. Baxter <sup>1</sup>, Lisheng Dai <sup>1</sup>, Chelsea Sanders <sup>2</sup>, Sandra Burkett <sup>3</sup>, Ryan N. Baugher <sup>4</sup>, Stephanie D. Mellott <sup>4</sup>, Todd B. Young <sup>4</sup>, Heidi E. Lawhorn <sup>4</sup>, Simone Difilippantonio <sup>2</sup>, Baktiar Karim <sup>5</sup>, Yuwaraj Kadariya <sup>6</sup>, Ligia A. Pinto <sup>1</sup>, Joseph R. Testa <sup>6</sup>, Robert H. Shoemaker <sup>7</sup>

## 1. Supplementary Figures

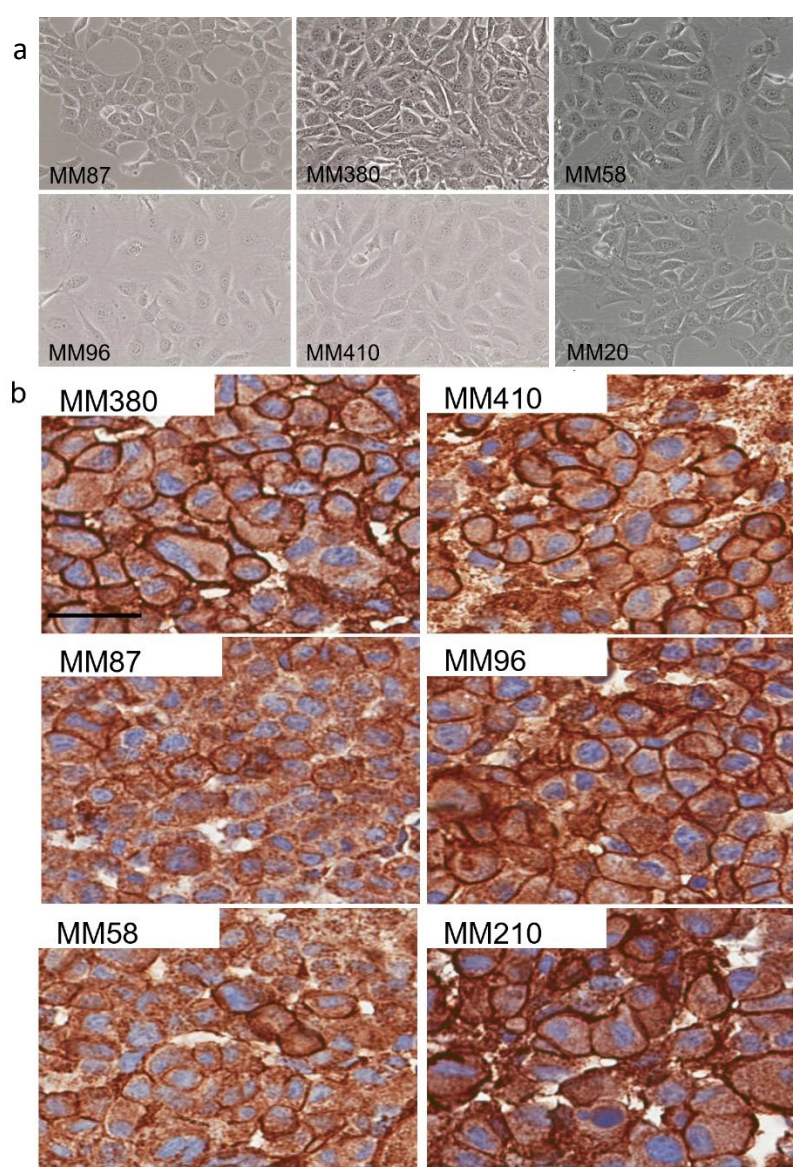

**Figure S1.** a. Morphology of MMe cells in culture. b. IHC staining of MSLN on FFPE sections prepared from cell pellets. Scale bar: 25um.

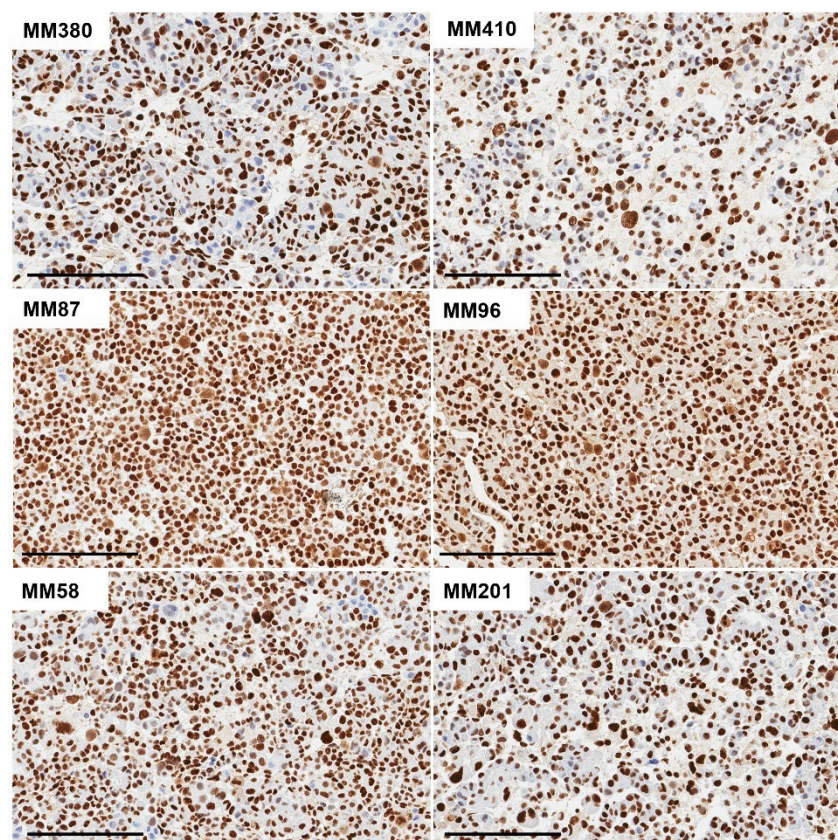

**Figure S2.** IHC staining of WT1 on FFPE sections prepared from cell pellets. Scale bar: 100um.



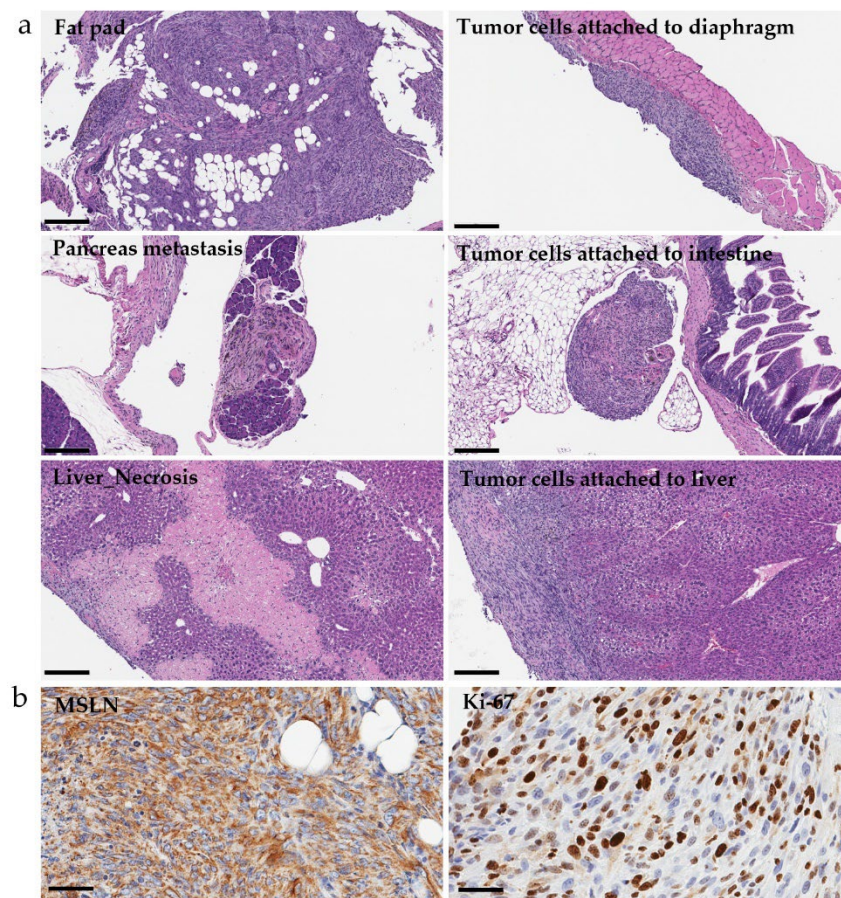

**Figure S3.** a. H.E. staining (scale bar: 200µm) and b. IHC staining of MSLN and Ki67 (scale bar: 50µm) on FFPE sections from *de novo* tumors developed in *Cdkn2a*<sup>+/-</sup>;*Nf2*<sup>+/-</sup> mice exposed to asbestos.

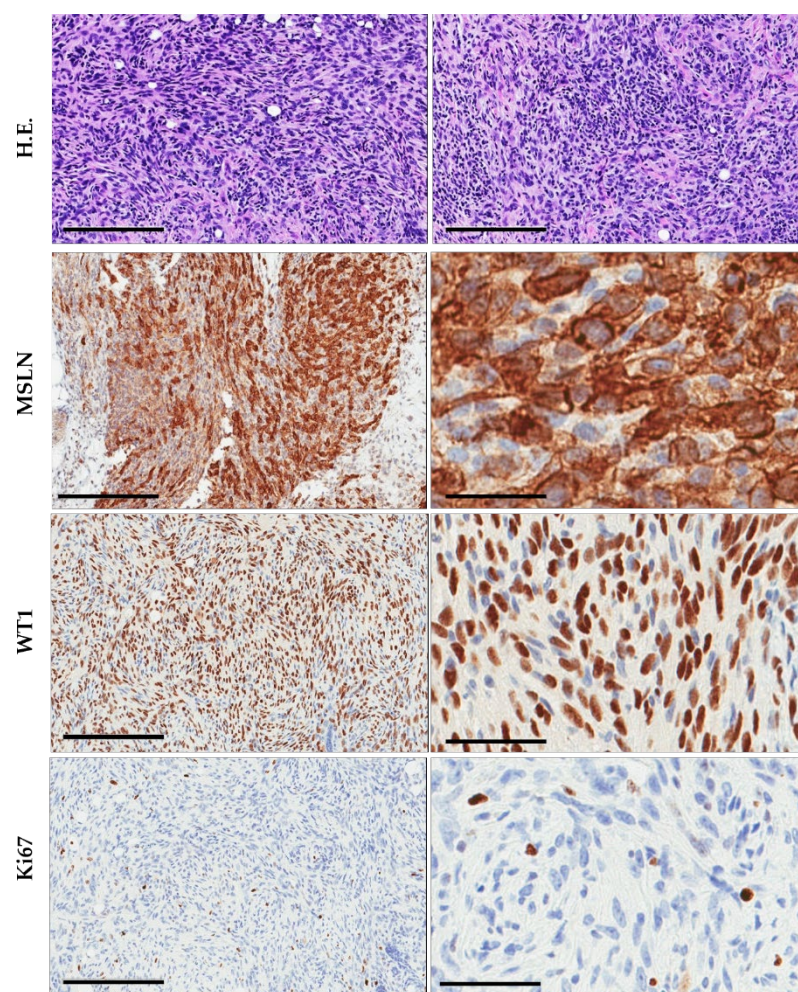

**Figure S4.** H.E. staining (scale bar: 200um) and IHC staining of MSLN, WT1, and Ki67 (scale bar: left panel 200um; right panel 50um) on FFPE sections of MM96 s.c. tumors.

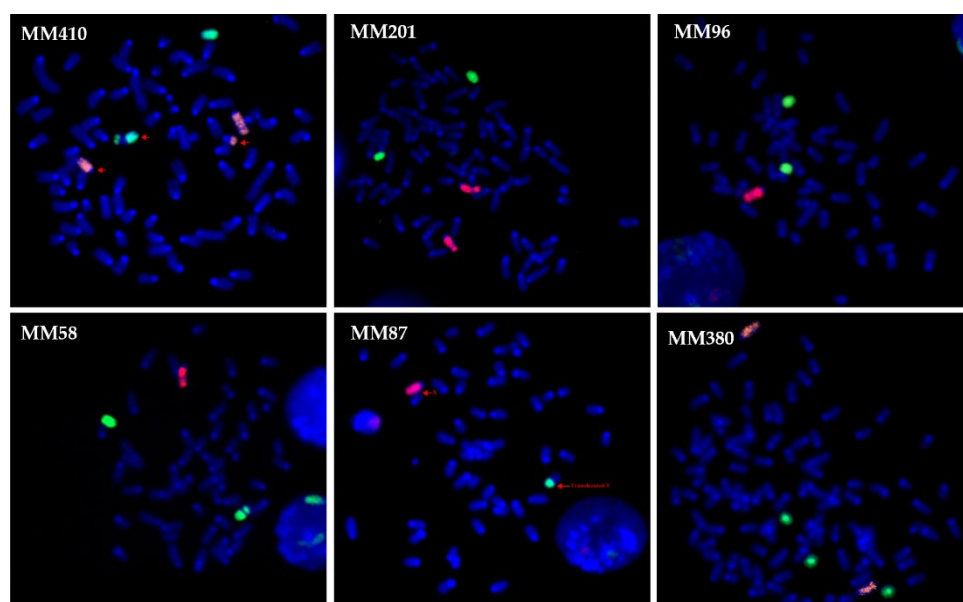

**Figure S5.** Chromosome X and Y specific karyotyping of six MMe cell lines. X chromosome: red/pink; Y chromosome: anti-Digoxigenin (DIG) FITC. Red arrows indicate translocations.

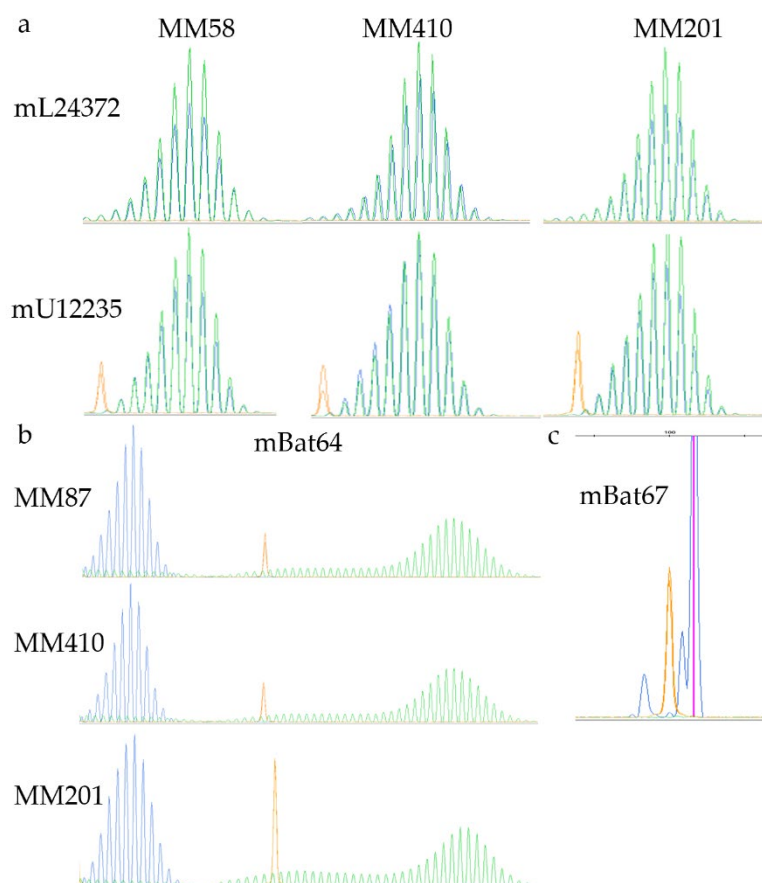

**Figure S6.** MSI status in plasma cfDNA from tumor-bearing animals inoculated with MMe cells. a. mL247372 and mU12235 in cfDNA from animals injected with MM58, MM410 or MM201 cells. b. mBat64 in cfDNA from animals injected with MM87, MM410 or MM201 cells. c. mBat67 in cfDNA from animals injected with MM201 cells.

## 2. Supplementary Tables

**Table S1.** Summary of antibodies used for IHC staining.

| Antibody          | Vendor      | Catalog# | Dilution |
|-------------------|-------------|----------|----------|
| Ki67              | Millipore   | AB9260   | 1:250    |
| WT1               | Abcam       | AB89901  | 1:500    |
| Mesothelin (MSLN) | IBL America | 28127    | 1:800    |
| TERT              | Millipore   | AB9260   | 1:250    |

**Table S2.** Primers used for MSI assessment by fragment analysis and Sanger sequencing.

| Target | Fragment Analysis Forward Primer            | Fragment Analysis Reverse Primer   | Sanger Forward Primer                                       | Sanger Reverse Primer                                            |
|--------|---------------------------------------------|------------------------------------|-------------------------------------------------------------|------------------------------------------------------------------|
| L24372 | 5'-FAM-GGGAAGACT<br>GCTTAGGGAAGA-3'         | 5'-ATTTGGCTTTCAAGCATC<br>CATA-3'   | N/A                                                         | N/A                                                              |
| U12235 | 5'-FAM-GCTCATCTTC<br>GTTCCCTGTC-3'          | 5'-CATTCCGTGGAAAGCT<br>CTGA-3'     | N/A                                                         | N/A                                                              |
| mBat64 | 5'-FAM-GCCCACT<br>CCTGAAAACAGTCAT-3'        | 5'-CCCTGGTGTGGCAACAT<br>TAAGC-3'   | N/A                                                         | N/A                                                              |
| mBat30 | 5'-VIC-ATTTGGCTT TCAA-<br>GCATCCATA-3'      | 5'-GGGAAGACTGCTTAG<br>GGAAGA-3'    | N/A                                                         | N/A                                                              |
| mBat37 | 5'-NED-TCTGCCCAA AC-<br>GTGCTTAAT-3'        | 5'-CCTGCCTGGGCTAA AA-<br>TAGA-3'   | N/A                                                         | N/A                                                              |
| mBat67 | 5'-FAM-TCCATCACGTT TA-<br>TATTTTAACAGAA -3' | 5'-TTGCCCATTTATC<br>ATCTAGTTCAT-3' | 5'- GTAAAACGACGGCCAGT<br>TCCATCACGTTTA-<br>TATTTTAACAGAA-3' | 5'- GGAAACAGCTATGAC-<br>CATG<br>TTGCCCATTTATCATCTAG-<br>TTCAT-3' |

**Table S3.** PCR conditions for fragment analysis and Sanger sequencing.

| Targets                | PCR Conditions                                                                                                                                            |
|------------------------|-----------------------------------------------------------------------------------------------------------------------------------------------------------|
| mBat30 and mBat37      | 98 °C for 30 s, then 45 cycles of 98 °C for 10 s, 61 °C for 10 s, 72 °C for 15 s; followed by a final extension of 72 °C for 5 min, then holding at 4 °C. |
| mBat64, L24372, U12235 | 98 °C for 30 s, then 40 cycles of 98 °C for 10 s, 56 °C for 10 s, 72 °C for 15 s; followed by a final extension of 72 °C for 5 min, then holding at 4 °C. |
| mBat67*                | 98 °C for 30 s, then 40 cycles of 98 °C for 10 s, 58 °C for 10 s, 72 °C for 30 s; followed by a final extension of 72 °C for 5 min, then holding at 4 °C. |

\*Same PCR condition was used for mBAT67 primers for Fragment Analysis and Sanger sequencing.



**Table S4.** Genetic profiling using nine STR markers.

| Marker name | MM410  | MM380 | MM87       | MM96       | MM58       | MM201      | FVB/NCrl |
|-------------|--------|-------|------------|------------|------------|------------|----------|
| MCA-4-2     | 19.3   | 19.3  | 19.3       | 19.3       | 19.3       | 19.3       | 19.3     |
| MCA-5-5     | 13, 14 | 14    | 14         | 14         | 14         | 13, 14     | 14       |
| MCA-6-4     | 15.3   | 15.3  | 15.3, 16.3 | 15.3, 16.3 | 15.3, 16.3 | 15.3, 16.3 | 15.3     |
| MCA-6-7     | 12, 17 | 12    | 12         | 12         | 12         | 12         | 12       |
| MCA-9-2     | 15     | 15    | 15         | 15         | 15         | 15         | 15       |
| MCA-12-1    | 20     | 20    | 20         | 20         | 20         | 20         | 20       |
| MAC-15-3    | 20.3   | 20.3  | 20.3       | 20.3       | 20.3       | 20.3       | 20.3     |
| MCA-18-3    | 17     | 17    | 17         | 17         | 17         | 17         | 17       |
| MCA-X-1     | 26     | 27    | 26         | 26         | 26         | 26         | 26       |

The data is presented as number of repeats. A decimal point indicates microvariants (an incomplete repeat). Please note that a 1 base pair difference in allele sizes between the sample and the comparison profile represents run-to-run variability only. Sizes 2 base pairs or greater represent different allele sizes between the sample and the comparison profile. Usually if there are no more than 3 allele size differences it is considered originating from this strain (substrains variation).

**Table S5.** Summary of MHC class I haplotype expression in cell lines by flow cytometry analysis.

| Cell line | MHC I haplotype |             |
|-----------|-----------------|-------------|
|           | H-2Kq           | H-2Dq/H-2Lq |
| MM410     | 96.6%           | 99.7%       |
| MM380     | 99.9%           | 99.8%       |
| MM87      | 99%             | 90.3%       |
| MM96      | 98.3%           | 98.6%       |
| MM58      | 97.4%           | 83.7%       |
| MM201     | 78%             | 77.4%       |

**Table S6.** Summary of MSLN expression in cell lines by flow cytometry analysis and IHC staining.

| Cell line        | % MSLN + (among live cells) by flow | MSLN by IHC on cell pellet blocks |
|------------------|-------------------------------------|-----------------------------------|
| Negative control | 0.1%                                | -                                 |
| MM380            | 68.8%                               | +                                 |
| MM410            | 54.6%                               | +                                 |
| MM87             | 67.5%                               | +                                 |
| MM96             | 94.1%                               | +                                 |
| MM58             | 61.7%                               | +                                 |
| MM201            | 49.8%                               | +                                 |

+, positive (not quantitative)

**Table S7.** Summary of MSLN, WT1, TERT, and Ki67 IHC data.

| Animal ID (i.p. tumors) | MSLN | WT1 | TERT | Ki67 |
|-------------------------|------|-----|------|------|
| 01                      | +    | +   | +    | +    |
| 02                      | +    | +   | +    | +    |
| 03                      | +    | +   | +    | +    |
| 04                      | +    | +   | +    | +    |

+, positive (not quantitative)

**Table S8.** Karyotyping of six MMe cell lines via SKY analysis.

| Cell Line | Karyotype                                                                                                                                                                                                             |
|-----------|-----------------------------------------------------------------------------------------------------------------------------------------------------------------------------------------------------------------------|
| MM96      | 63,XXY,-X,Ts(1)+T(2;16),+Del(3),-4,Tet(5),Ts(6),+Del(6),+T(8;12)x3,Ts(9), Tet(10),Ts(11),+T(12;8;12),-12,T(12;8),+T(13;4),Ts(14),Ts(15),Tet(16),Ts(17),Tet(18),Tet(19)                                                |
| MM87      | 58,XY,-1,T(1;15),Ts(2),Ts(3),Ts(5),Ts(6),CenDf(8)x3,+8,Ts(10),+T(11;Y),+Cen(11),+T(8;13),Ts14,+T(15;1),+Del(17)x2,Tet(19),+Cen,+Cen T(3;14)                                                                           |
| MM410     | 48,XY,-1,T(1;15),Ts(5),Ts(6),CenDf(8)x2,+8,+T(8;13),Ts(14),-15,T(15;1),Ts(17),Ts(19),+Cenx2                                                                                                                           |
| MM201     | 77,X,-X,T(X;9),YY,Tet(1),+Del(3),-4,T(4;11),Ts(5),Tet(6),Tet(7),Tet(8),Tet(9),Pent(10),-11,+T(11;4)x2,+T(11;4),Ts(12),+Del(12),+T(3;13)x2,+T(14;5),Ts(14),Tet(15),Ts(16),Tet(17),Tet(18),Ts(19),+Del(19)x2            |
| MM380     | 81,XXYY,Tet(1),Tet(2),Tet(3),Tet(4),+T(4;8)x2,Tet(5),Tet(6),Ts(7),Tet(8),Tet(9),Ts(10),Ts(11),Ts(12),+T(12;4),Tet(13),Tet(14),Pent(15),Tet(16),Tet(17),Tet(18),+T(18;12),M(X),M(Y)                                    |
| MM58      | 64,XY,Ts(1),Tet(2),+Del(4)x2,Tet(5),Tet(6),Ts(8),Tet(10),Tet(11),Ts(12),Ts(13),Ts(14),Tet(15),Tet(17),Ts(18),Tet(19)                                                                                                  |
|           | 103,XXYY,Hex (1),Hex(2),Ts(3), +DIC (4;7),T(4;7)+DIC (4;4),+Del(4)x3,Hex(5),+Del(5),+Cen(5),Hex(6),Hex(6),Tet(9),Pent(10),Tet(11),Tet(12),+Del(12)x2,Ts(13),+Del(13),Pent(14),Pent (15),Tet(16),Pent(17),Tet(18),19x7 |
|           | 108,XXYYYY,+Del(X),Tet(1),Pent(2),Tet(3),+Del(4)x5,+Dup(4),Hex(5),Hex(6),Tet(7),(8)x6,Hex(10),Hex(11),Tet(12),Tet(13),+Del(13)x2,Pent(14),Hex(15),Tet(16),Pent(17),+Del(17), Ts(18),+CenDf(18),Pent(19)               |
|           | 55,XXY,+Del(3),Ts(5),-8,+CenDF(8)x2,+T(8;13),Ts(9),Ts(10),-11,Del(11),-13,T(8;13),+Del(13),T(13;12),Ts(14), Ts(15),Ts(17),Tet(18),Tet(19)                                                                             |
|           | 54,XXY,Ts(2),Ts(3),+T(3;5;3),Tet(6),-8,+CenDF(8)X2,+T(8;5),+Del(11),Ts(13),Ts(14),Ts(15),Ts(17),Ts(19)                                                                                                                |
|           | 48,XY,-4,Ts(5),Ts(6),+CenDF(8)x2,-8,T(8;13),-13x2,+Del(13),T(13;8),T(13;12),+Dup(14),Ts(17),Ts(19)                                                                                                                    |
|           | 55,XY,Ts(2),Ts(3),Ts(5),Ts(6),+CenDF(8)x2,-8,T(8;13),Ts(10),+Del(11),?Dup(12),+Del(13),+Dup(14),-15,T(15;1),Tet(17),Ts(19)                                                                                            |
|           | 52,XY,Ts(2),Ts(3)Tet(6),+CenDF(8),-8,T(8;5),+Del(13),+Dup(14),+Del(14),Ts(15),Ts(17),Ts(19)                                                                                                                           |

Abbreviations: T, translocation; Ts, trisomy; Tet, tetrasomy; Pent, five copies; Hex, 6 copies; Del, deletion; Cen, Centromere (loss usually); CenDf, centromere deficiency; Del, deletion; Dic, dicentric; Dup, duplication (usually involving material from same chromosome so not a translocation of material from something else); M, marker chromosome too little material for definite characterization; The (x) the number, example (19)x7: chromosome 19, 7 copies.

**Table S9.** Inter-chromosomal translocations (T) observed in MMe cells.

| Mouse chromosome | Inter-chromosomal translocation                  |
|------------------|--------------------------------------------------|
| 1                | T(1;15)                                          |
| 2                | T(2;16)                                          |
| 3                | T(3;14), T(3;13), T(3;5;3)                       |
| 4                | T(4;8), T(4;11), T(13;4), T(12;4), T(4;7)        |
| 5                | T(8;5), T(3;5;3), T(14;5)                        |
| 7                | T(4;7)                                           |
| 8                | T(4;8), T(8;5), T(8;12), T(8;13)                 |
| 9                | T(X;9)                                           |
| 11               | T(11;4), T(11;Y)                                 |
| 12               | T(12;8), T(12;4), T(18;12), T(13;12), T(12;8;12) |
| 13               | T(8;13), T(3;13), T(13;4), T(13;12), T(13;8)     |
| 14               | T(14;5), T(3;14)                                 |
| 15               | T(15;1)                                          |
| 16               | T(2;16)                                          |
| 18               | T(18;12)                                         |
| X                | T(X;9)                                           |
| Y                | T(11;Y)                                          |



**Table S10.** MSI status in MMe cell DNA and plasma cfDNA from animals injected with MMe cells.

| DNA                            |       | Fragment Analysis |            |        |        |        | Sanger Sequencing |                 |
|--------------------------------|-------|-------------------|------------|--------|--------|--------|-------------------|-----------------|
|                                |       | U12235-A24        | L24372-A27 | mBat30 | mBat37 | mBat64 | mBat67*           | mBat67*         |
| Cells                          | MM201 | wt                | wt         | wt     | wt     | m43    | m244              | 258 bp deletion |
|                                | MM87  | wt                | wt         | wt     | wt     | m43    | m244              | 258 bp deletion |
|                                | MM410 | wt                | wt         | wt     | wt     | m43    | m244              | 258 bp deletion |
| Plasma                         | MM201 | wt                | wt         | n.a.   | n.a.   | m42    | m244              | n.a.            |
|                                | MM58  | wt                | wt         | n.a.   | n.a.   | m42    | n.a.              | n.a.            |
|                                | MM410 | wt                | wt         | n.a.   | n.a.   | m42    | n.a.              | n.a.            |
| wt intestinal epithelial cells |       | wt                | wt         | wt     | wt     | wt     | wt                | n.a.            |
| wt tail                        |       | wt                | wt         | wt     | wt     | wt     | wt                | wt              |

n.a., not analyzed; m, minus (deletion)

\*The size of shifted peaks by fragment analysis was calculated by comparing the profile of MMe cells to that of wt control. However, the size of deletion by Sanger sequencing was calculated based on reference sequence. Thus, the size of deletion calculated using two different technologies was different.
